# Supplementary material
Source: HighWire-hosted journal article supplement (https://ard.bmj.com/content/annrheumdis-2021-221640)

**Table S1. TNFi (including biosimilars) started at baseline in the PsABio study effectiveness set)**

| TNFi (branded or biosimilar), n (%) | All lines (n=455) | First-line (n=251) | Second-line (n=149) | Third-line (n=55) |
|-------------------------------------|-------------------|--------------------|---------------------|-------------------|
| Etanercept                          | 148/455 (32.5)    | 95/148 (64.2)      | 45/148 (30.4)       | 8/148 (5.4)       |
| Adalimumab                          | 115/455 (25.3)    | 63/115 (54.8)      | 42/115 (36.5)       | 10/115 (8.7)      |
| Golimumab                           | 86/455 (18.9)     | 51/86 (59.3)       | 27/86 (31.4)        | 8/86 (9.3)        |
| Certolizumab                        | 71/455 (15.6)     | 24/71 (33.8)       | 26/71 (36.6)        | 21/71 (29.6)      |
| Infliximab                          | 35/455 (7.7)      | 18/35 (51.4)       | 9/35 (25.7)         | 8/35 (22.9)       |

TNFi, tumour necrosis factor inhibitor.

**Table S2. Previous bDMARD agent exposure (including biosimilars) of patients initiating second- or third-line treatment in PsABio (effectiveness set)**

| n (%)        | UST cohort  | TNFi cohort |
|--------------|-------------|-------------|
| <b>Total</b> | 241         | 204         |
| Adalimumab   | 79 (32.8)   | 64 (31.4)   |
| Etanercept   | 74 (30.7)   | 60 (29.4)   |
| Infliximab   | 29 (12.0)   | 33 (16.2)   |
| Golimumab    | 31 (12.9)   | 16 (7.8)    |
| Certolizumab | 18 (7.5)    | 7 (3.4)     |
| Ustekinumab  | not allowed | 14 (6.9)    |
| Other        | 10 (4.1)    | 10 (4.9)    |

bDMARD, biological disease-modifying antirheumatic drug; TNFi, tumour necrosis factor inhibitor; UST, ustekinumab.

**Table S3. Observed duration of initial treatment line for ustekinumab- and TNFi-treated (including biosimilars) patients up to 1 year in the PsABio study (effectiveness set)**

| <b>N, months (mean) [SD]</b>      | <b>All lines</b> | <b>First-line</b> | <b>Second-line</b> | <b>Third-line</b> |
|-----------------------------------|------------------|-------------------|--------------------|-------------------|
| UST                               | 438 (13.1) [3.5] | 197 (13.5) [3.2]  | 151 (12.8) [3.6]   | 90 (12.5) [4.0]   |
| TNFi (branded or biosimilar), any | 455 (12.7) [4.2] | 251 (13.1) [3.8]  | 149 (12.5) [4.4]   | 55 (11.1) [5.0]   |
| Infliximab                        | 35 (13.6) [3.4]  | 18 (14.2) [2.8]   | 9 (13.9) [2.3]     | 8 (11.8) [5.2]    |
| Adalimumab                        | 115 (12.2) [4.5] | 63 (12.6) [4.2]   | 42 (12.0) [4.8]    | 10 (10.8) [5.3]   |
| Golimumab                         | 86 (13.9) [2.9]  | 51 (14.0) [2.8]   | 27 (13.9) [2.9]    | 8 (13.5) [4.3]    |
| Etanercept                        | 148 (12.4) [4.3] | 95 (12.6) [4.0]   | 45 (11.8) [4.9]    | 8 (12.7) [3.3]    |
| Certolizumab                      | 71 (11.9) [4.8]  | 24 (13.0) [4.0]   | 26 (12.9) [4.5]    | 21 (9.5) [5.3]    |

Duration of treatment line is shown in months.

SD, standard deviation; TNFi, tumour necrosis factor inhibitor; UST, ustekinumab.

**Table S4. PsAID-12 scores by baseline characteristic subgroup**

| Mean (95% CI)                  | UST               |                                                  | TNFi              |                                                  |
|--------------------------------|-------------------|--------------------------------------------------|-------------------|--------------------------------------------------|
|                                | Baseline          | Unadjusted change from baseline at 1 year (LOCF) | Baseline          | Unadjusted change from baseline at 1 year (LOCF) |
| Biologic line                  |                   |                                                  |                   |                                                  |
| First                          | 5.51 (5.19; 5.82) | -2.14 (-2.49 ; -1.79)                            | 5.44 (5.15; 5.72) | -2.41 (-2.72; -2.09)                             |
| Second                         | 6.05 (5.69; 6.41) | -2.14 (-2.55 ; -1.72)                            | 5.57 (5.19; 5.95) | -2.37 (-2.79; -1.94)                             |
| Third                          | 5.84 (5.33; 6.35) | -1.81 (-2.45 ; -1.17)                            | 5.34 (4.52; 6.15) | -1.89 (-2.62; -1.16)                             |
| Sex*                           |                   |                                                  |                   |                                                  |
| Male                           | 5.27 (4.95; 5.59) | -2.35 (-2.70 ; -1.99)                            | 4.89 (4.56; 5.23) | -2.49 (-2.83; -2.15)                             |
| Female                         | 6.14 (5.86; 6.43) | -1.86 (-2.20 ; -1.52)                            | 5.95 (5.67; 6.23) | -2.20 (-2.53; -1.87)                             |
| Enthesitis                     |                   |                                                  |                   |                                                  |
| Yes                            | 5.95 (5.66; 6.24) | -2.19 (-2.51 ; -1.86)                            | 5.89 (5.61; 6.17) | -2.65 (-2.98; -2.31)                             |
| No                             | 5.51 (5.19; 5.83) | -1.98 (-2.36 ; -1.59)                            | 4.99 (4.65; 5.32) | -2.02 (-2.35; -1.68)                             |
| Psoriasis BSA, %               |                   |                                                  |                   |                                                  |
| <3                             | 5.66 (5.32; 6.00) | -1.60 (-2.03 ; -1.18)                            | 4.97 (4.63; 5.31) | -1.89 (-2.25; -1.52)                             |
| 3–10                           | 5.44 (5.05; 5.83) | -2.16 (-2.59 ; -1.74)                            | 5.78 (5.43; 6.14) | -2.99 (-3.38; -2.59)                             |
| >10                            | 6.15 (5.70; 6.60) | -2.93 (-3.43 ; -2.43)                            | 6.13 (5.55; 6.71) | -2.86 (-3.49; -2.23)                             |
| Joint involvement <sup>†</sup> |                   |                                                  |                   |                                                  |
| Mono/oligoarticular            | 5.07 (4.56; 5.58) | -1.96 (-2.47 ; -1.45)                            | 4.82 (4.38; 5.25) | -2.18 (-2.66; -1.70)                             |
| Polyarticular                  | 5.98 (5.75; 6.22) | -2.21 (-2.51 ; -1.92)                            | 5.78 (5.52; 6.04) | -2.47 (-2.75; -2.18)                             |
| FiRST score*                   |                   |                                                  |                   |                                                  |
| <5                             | 5.15 (4.87; 5.44) | -2.18 (-2.50 ; -1.87)                            | 5.10 (4.83; 5.36) | -2.44 (-2.71; -2.16)                             |
| ≥5                             | 6.72 (6.43; 7.00) | -1.95 (-2.38 ; -1.53)                            | 6.49 (6.15; 6.83) | -2.09 (-2.57; -1.61)                             |

\*At BL and 1 year, a clinically relevant difference was observed between female patients and patients with FiRST score ≥5 (chronic widespread pain) and male patients and those with FiRST score <5. <sup>†</sup>Polyarticular patients were significantly more impacted at BL, but not 1 year.

BSA, body surface area; CI, confidence interval; FiRST, Fibromyalgia Rapid Screening Tool; LOCF, last observation carried forward.

**Table S5. Overview of adverse events frequency (ustekinumab versus TNFi)**

| n (%)                                                                              | UST (n= 467)*                                                                     | TNFi (n= 502)*                                                      |
|------------------------------------------------------------------------------------|-----------------------------------------------------------------------------------|---------------------------------------------------------------------|
| Patients with ≥1 AE                                                                | 114 (24.4)                                                                        | 144 (28.7)                                                          |
| Patients with ≥1 drug related AE <sup>†</sup>                                      | 53 (11.3)                                                                         | 74 (14.7)                                                           |
| Patients with ≥1 SAE                                                               | 21 (4.5)                                                                          | 17 (3.4)                                                            |
| Patients with ≥1 drug related SAE <sup>†</sup>                                     | 3 (0.6)                                                                           | 6 (1.2)                                                             |
| Patients with ≥1 severe adverse event                                              | 18 (3.9)                                                                          | 14 (2.8)                                                            |
| Patients with ≥1 AE leading to withdrawal of study drug                            | 30 (6.4)                                                                          | 38 (7.6)                                                            |
| Patients with ≥1 drug related AE leading to withdrawal of study drug               | 21 (4.5)                                                                          | 29 (5.8)                                                            |
| Patients with ≥1 AE leading to permanent discontinuation of the study              | 4 (0.9)                                                                           | 6 (1.2)                                                             |
| Patients with ≥1 drug related AE leading to permanent discontinuation of the study | 0                                                                                 | 4 (0.8)                                                             |
| Patients with serious infections                                                   |                                                                                   |                                                                     |
| Pneumonia                                                                          | 0                                                                                 | 3 (0.6)                                                             |
| Cellulitis                                                                         | 1 (0.2)                                                                           | 0                                                                   |
| Skin infection                                                                     | 1 (0.2)                                                                           | 0                                                                   |
| Staphylococcal bacteraemia                                                         | 1 (0.2)                                                                           | 0                                                                   |
| Malignancy (excluding non-melanoma skin cancer)                                    | 4 (0.9)                                                                           | 3 (0.6)                                                             |
|                                                                                    | Cutaneous<br>T-cell lymphoma<br>Parathyroid tumour<br>Lung neoplasm<br>Meningioma | Lung adenocarcinoma<br>Myelodysplastic syndrome<br>Renal oncocytoma |
| Non-melanoma skin cancer                                                           | 1 (0.2)                                                                           | 2 (0.4)                                                             |
|                                                                                    | Bowen's disease                                                                   | Basal cell carcinoma<br>Squamous cell carcinoma                     |
| Cardiovascular AEs <sup>‡</sup>                                                    | 2 (0.4)                                                                           | 6 (1.1)                                                             |
|                                                                                    | Extrasystoles                                                                     | Atrial fibrillation                                                 |

|       |             |                                                                                                    |
|-------|-------------|----------------------------------------------------------------------------------------------------|
|       | Bradycardia | Cardiac flutter<br>Supraventricular<br>tachycardia<br>Tachyarrhythmia<br>Tachycardia<br>Arrhythmia |
| Death | 1 (0.2)     | 1 (0.2)                                                                                            |

\*AEs were summarised under the initial treatment line as well as under all treatments that started within a 91-day safety period after the initial treatment line prior to the AE. Therefore, the same patient could be assigned to both columns.

†Refers to AEs or SAEs that could be related to a biologic disease-modifying antirheumatic drug, according to study investigator.

\*One TNFi-treated patient experienced 3 events (2 atrial fibrillation and 1 tachyarrhythmia) at 0–6 months. The same patient experienced 1 further event of atrial fibrillation at 6–12 months. All other events experienced by 1 patient each. Due to the observational nature of the study, no further information on the cardiac events could be retrieved.

AE, adverse event; SAE; serious adverse event.

Figure S1. Patient population flow diagram

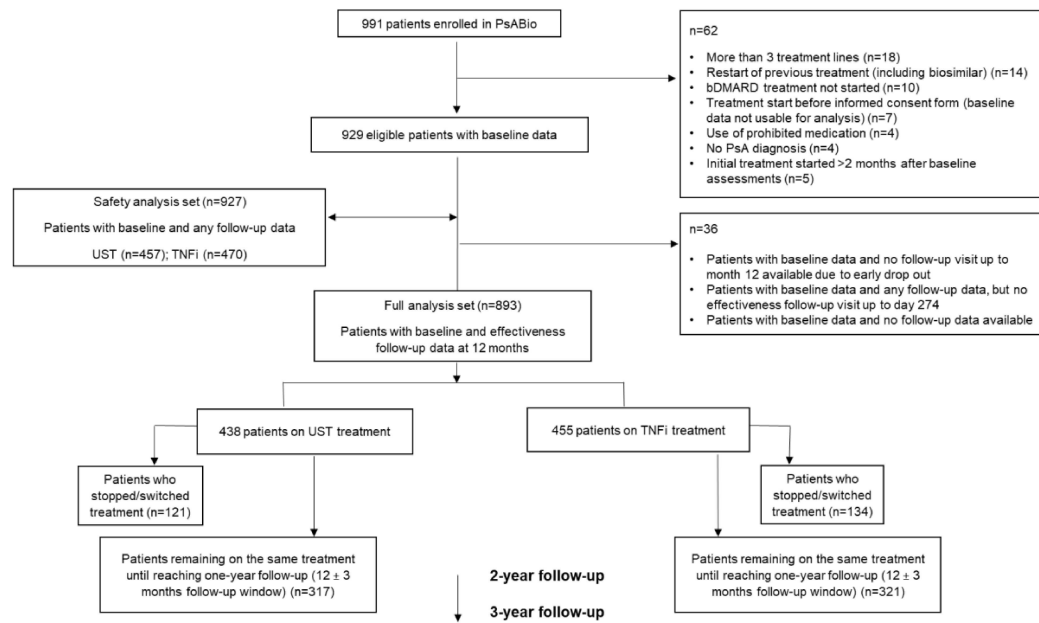

Supplement: inline-supplementary-material-1 [file inline-supplementary-material-1.pdf]
